# Supplementary material for: L-arginine dependence of breast cancer – molecular subtypes matter.
Source: Springer Nature journal article supplement (doi:10.1186/s12885-025-13908-4), 2025-03-26
Supplement: MOESM1 [file 12885_2025_13908_MOESM1_ESM.pdf]

***L-Arginine dependence of breast cancer –  
molecular subtypes matter.***

Juliane Hannemann<sup>1\*</sup>, Leticia Oliveira-Ferrer<sup>2</sup>, Anne Kathrin Goele<sup>1</sup>, Yoana Mileva<sup>1</sup>,  
Fiona Kleinsang<sup>1</sup>, Antonia Röglin<sup>1</sup>, Isabell Witzel<sup>3</sup>, Volkmar Müller<sup>2</sup>, Rainer Böger<sup>1</sup>

<sup>1</sup> Institute of Clinical Pharmacology and Toxicology and <sup>2</sup>Department of Gynecology, University  
Medical Center Hamburg-Eppendorf, Hamburg, Germany, <sup>3</sup>Department of Gynecology, University  
Hospital Zürich, Zürich, Switzerland

**Supplementary Material**

## Supplementary Table

**Supplementary Table 1.** Specific TaqMan gene expression assays for real-time quantitative PCR for each of the genes analyzed in this study.

| Target Gene | Taqman gene expression assay identifier |
|-------------|-----------------------------------------|
| ARG1        | Hs00968979_m1                           |
| ARG2        | Hs00982833_m1                           |
| DDAH1       | Hs00201707_m1                           |
| DDAH2       | Hs00967863_g1                           |
| ASS1        | Hs01597989_g1                           |
| ASL         | Hs00902699_m1                           |
| PRMT1       | Hs01587651_g1                           |
| PRMT2       | Hs00895397_m1                           |
| PRMT3       | Hs00969596_m1                           |
| PRMT4       | Hs00406354_m1                           |
| PRMT5       | Hs01047356_m1                           |
| PRMT6       | Hs05054640_s1                           |
| PRMT7       | Hs00219300_m1                           |
| PRMT8       | Hs00998598_m1                           |
| PRMT9       | Hs00378858_m1                           |

**Gene names:** ARG, arginase; DDAH, dimethylarginine dimethylaminohydrolase; ASS, L-arginine succinate synthase; ASL, L-arginine succinate lyase; PRMT, protein-arginine methyltransferase.

## Supplementary Figures

### Supplementary Figure 1.

Schematic representation of major L-arginine-metabolizing pathways. L-arginine is converted to L-citrulline and nitric oxide by nitric oxide synthases or to L-ornithine and urea by arginases. Further, it can be methylated by a family of protein-arginine N-methyltransferases (PRMTs), of which three distinct subtypes can be discriminated. The dimethylarginines, ADMA and SDMA, are released upon hydrolytic degradation of methylated proteins. ADMA is metabolically cleaved to L-citrulline and dimethylamine by dimethylarginine dimethylaminohydrolases (DDAHs).

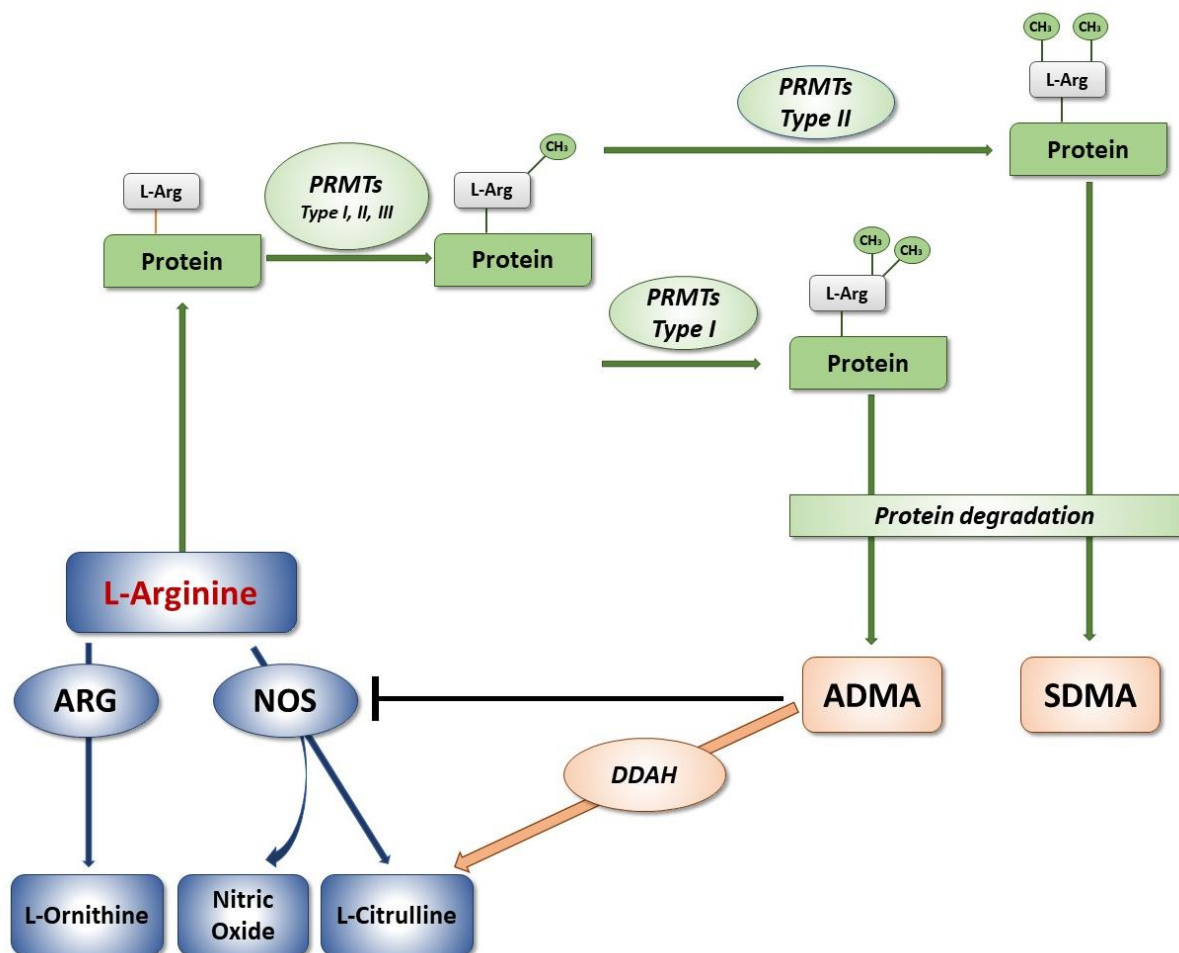

**Supplementary Figure 2.**

CONSORT flow diagram of the breast cancer study population.

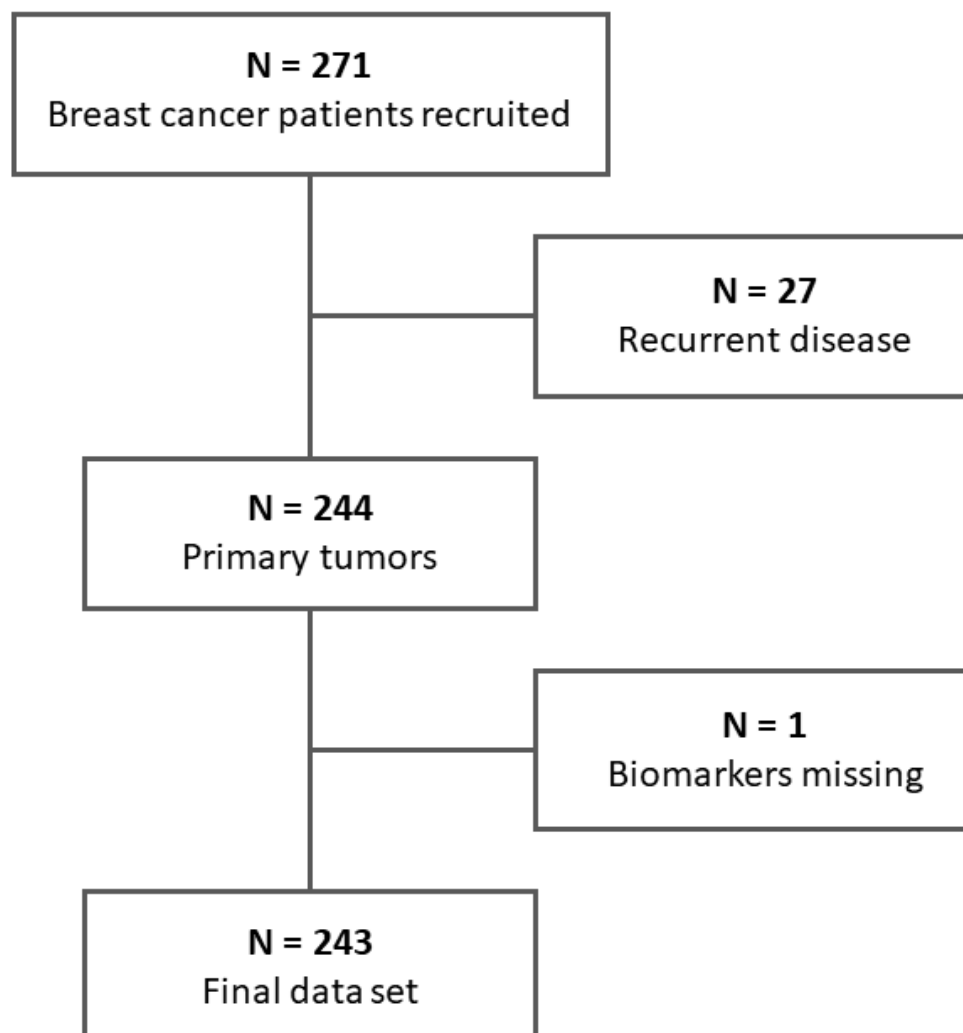

### Supplementary Figure 3.

Gene expression measured by quantitative real-time RT-qPCR for genes involved in the L-arginine salvage pathway: a) argininosuccinate synthase-1 (ASS1), b) argininosuccinate lyase (ASL). \*\*  $p < 0.001$  as compared to MCF-12A normal breast epithelial cells in two-way ANOVA followed by Dunnett's multiple comparisons test.

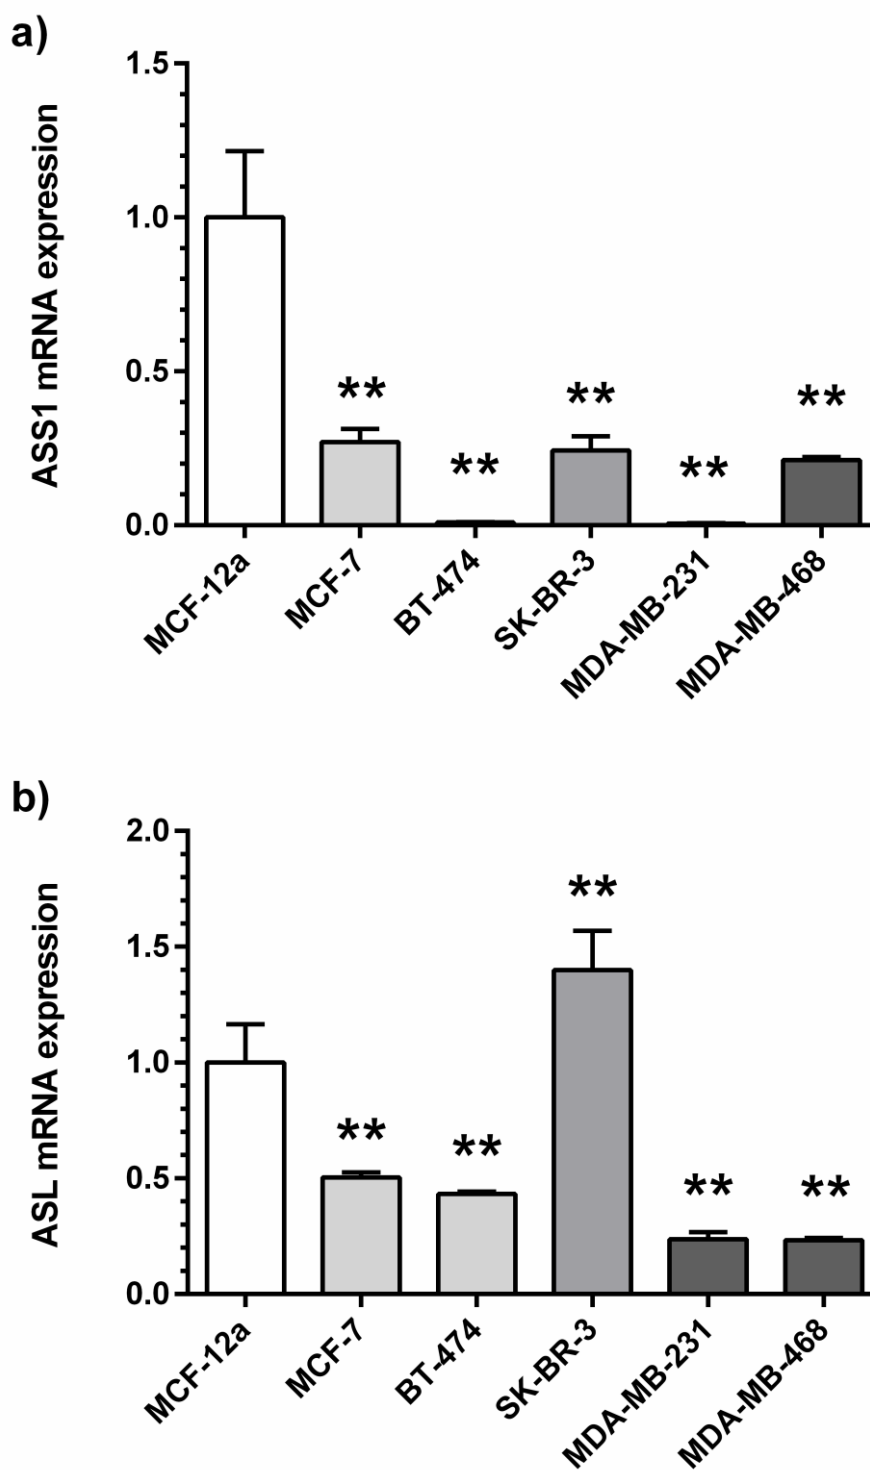

**Participant No:** \_\_\_\_\_

**Data documentation for study participant No.** \_\_\_\_\_

Date of documentation: \_\_\_\_\_

---

### General Patient Characteristics

|                          |            |                                |               |
|--------------------------|------------|--------------------------------|---------------|
| Date of birth            | _____      | Date of diagnosis              | _____         |
| Body weight at diagnosis | _____ (kg) | Height                         | _____ (cm)    |
| Date of surgery          | _____      | Serum creatinine (pre-surgery) | _____ (mg/dL) |

---

### Diagnosis / Medical History

- ☐ Primary breast cancer      ☐ Recurrent carcinoma      ☒ left      ☐ right breast
- ☐ IDC (Invasive, ductal carcinoma)
- ☐ ILC (Invasive, lobular carcinoma)
- ☐ DCIS (Ductal carcinoma *in situ*)
- ☐ LCIS (Lobular carcinoma *in situ*)

Remarks: \_\_\_\_\_  
(e.g., IDC with DCIS components;  
bifocal;  
microcalcifications) \_\_\_\_\_

### Histological Type

- |                                       |                                       |                                           |                                        |
|---------------------------------------|---------------------------------------|-------------------------------------------|----------------------------------------|
| <input type="checkbox"/> ductal       | <input type="checkbox"/> lobular      | <input type="checkbox"/> papillary        | <input type="checkbox"/> serous        |
| <input type="checkbox"/> endometrioid | <input type="checkbox"/> mucinous     | <input type="checkbox"/> serous-papillary | <input type="checkbox"/> clear-cell    |
| <input type="checkbox"/> tubular      | <input type="checkbox"/> inflammatory | <input type="checkbox"/> other            | <input type="checkbox"/> not specified |

**Participant No:** \_\_\_\_\_

**Previous Malignant Disease(s)**

☐ No

☐ Yes

If yes, which  
(type, date,  
etc.)

---

---

---

**Family History of Breast Cancer or other Malignant Diseases**

---

---

---

**TNM-State & Grading**

Grading:      ☐ 1      ☐ 2      ☐ 3

Tumor size      **pT** \_\_\_\_\_

Sentinel node      **N** \_\_\_\_\_      positive LN/dissected LN      \_\_\_\_ / \_\_\_\_

Metastasis      **M** \_\_\_\_\_      If positive, where?      \_\_\_\_\_

Lymphatic invasion      ☐ L0      ☐ L1

Vascular invasion      ☐ V0      ☐ V1      ☐ V2

Resection      ☐ R0      ☐ R1      ☐ R2

Date of secondary resection      \_\_\_\_\_      Thereafter R0?      ☐ yes      ☐ no

**Participant No:** \_\_\_\_\_

### Receptor State / Molecular Markers

|            |                                  |                                  |                              |           |                                      |
|------------|----------------------------------|----------------------------------|------------------------------|-----------|--------------------------------------|
| ER         | _____ /12                        | <input type="checkbox"/> N/A     | PR                           | _____ /12 | <input type="checkbox"/> N/A         |
| HER2       | <input type="checkbox"/> 0 (neg) | <input type="checkbox"/> 1 (pos) | <input type="checkbox"/> N/A | Ki-67     | _____ % <input type="checkbox"/> N/A |
| E-cadherin | <input type="checkbox"/> neg     | <input type="checkbox"/> pos     | <input type="checkbox"/> N/A |           |                                      |

---

### Therapy

#### **Surgery**

☐ Mastectomy      ☐ Lumpectomy      ☐ \_\_\_\_\_      ☐ None

#### **Chemotherapy**

☐ None      ☐ Yes, regimen: \_\_\_\_\_  
\_\_\_\_\_

#### **Radiotherapy**

☐ Yes      ☐ No

#### **Endocrine Therapy**

☐ None      ☐ Yes, which: \_\_\_\_\_  
\_\_\_\_\_



*Patient Questionnaire  
for Breast Cancer Follow-up Study, UKE*

## This image shows a blank sheet of white paper with horizontal ruling lines. The lines are evenly spaced and extend across the width of the page. There are no margins, text, or other markings on the paper.
